# Supplementary material for: Relationship of Physical Activity and Sedentary Time with Metabolic Health in Children and Adolescents Measured by Accelerometer: A Narrative Review
Source: MDPI journal article supplement (doi:10.3390/healthcare9060709), 2021-06-10
Supplement: s1 [file s1]

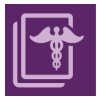

**Table S1.** Methods used for examining the accelerometer data collection protocols and processing criteria.

| Reference             | Outcome                           | Accelerometer        | Cut-off point/definition of bouts and breaks                                                                                                                                                                                                                                                                   | Epoch            | Valid days/week                                       | Valid h/day or min/day | Non-wear time |
|-----------------------|-----------------------------------|----------------------|----------------------------------------------------------------------------------------------------------------------------------------------------------------------------------------------------------------------------------------------------------------------------------------------------------------|------------------|-------------------------------------------------------|------------------------|---------------|
| Aadland et al. [28]   | Volume                            | ActiGraph (uniaxial) | SED: 0–99 CPM/LPA: 100–2295 CPM<br>MPA: 2296–4011 CPM/VPA: $\geq 4012$ CPM<br>- PA                                                                                                                                                                                                                             | 60s              | $\geq 4$                                              | 600–1080 min           | $\geq 60$ min |
| Aadland et al. [29]   | Volume<br>PA_Bouts                | ActiGraph (unknown)  | SED: 0–99 CPM/LPA: 100–2295 CPM<br>MPA: 2296–4011 CPM/VPA: $\geq 4012$ CPM<br>- PA_Bouts<br>• with $\geq 80\%$ of bout duration<br>• 1 s, 2–4 s, 5–9 s, 10–19 s, 20–29 s, 30–39 s, 40–59 s, 1.0–1.4 min, 1.5–1.9 min, 2.0–2.9 min, 3–4 min, 5–9 min, 10–29 min, 30–59 min, $\geq 60$ min                       | 1s<br>10s<br>60s | $\geq 4$                                              | $\geq 480$ min         | $\geq 60$ min |
| Bell et al. [30]      | Volume                            | ActiGraph (uniaxial) | SED: $<199$ CPM<br>MVPA: $\geq 3600$ CPM<br>- PA                                                                                                                                                                                                                                                               | 30 Hz            | $\geq 3$                                              | $\geq 600$ min         | $\geq 10$ min |
| Carson et al. [31]    | Volume<br>SED_Bouts<br>SED_Breaks | ActiGraph (unknown)  | SED: $\leq 100$ CPM<br>Brisk walking: 101 CPM to 4.0 METs<br>MVPA: $\geq 4.0$ METs<br>- SED_Bouts: 1–4 min, 5–9 min, 10–19 min, 20–29 min, $\geq 30$ min<br>- SED_Breaks: 5-s epoch change from SED to LPA or MVPA<br>- PA                                                                                     | 5s               | $\geq 4$                                              | $\geq 600$ min         | $\geq 60$ min |
| Carson & Janssen [32] | Volume<br>SED_Bouts<br>SED_Breaks | ActiGraph (uniaxial) | SED: 0–99 CPM/LPA: 100 CPM to 4.0 METs<br>MVPA: $\geq 4.0$ METs<br>- SED_Bouts<br>$\geq 30$ min (with $\geq 80\%$ of minutes below 100 CPM)<br>- SED_Breaks<br>• $<80\%$ of minutes below 100 CPM<br>• $\geq 5$ consecutive min $\geq 100$ CPM<br>- PA                                                         | 60s              | $\geq 4$                                              | $\geq 600$ min         | $\geq 20$ min |
| Chinapaw et al. [33]  | Volume<br>SED_Bouts               | ActiGraph (unknown)  | SED: 0–99 CPM/MVPA: $\geq 3000$ CPM<br>- SED_Bouts $\geq 10$ min (with 2 min tolerance)<br>- PA                                                                                                                                                                                                                | 15s              | $\geq 3$ week-days<br>+<br>$\geq 8$ h/day weekend day | $\geq 600$ min         | $\geq 20$ min |
| Colley et al. [34]    | Volume<br>SED_Bouts<br>SED_Breaks | Actical (unknown)    | SED: $\leq 100$ CPM/MVPA: $\geq 1500$ CPM<br>- SED_Bouts<br>• Lasting a minimum of 1 min (a transition from $<100$ to $\geq 100$ CPM)<br>• $\geq 20, 40, 60, 80, 100, 120$ min<br>- SED_Breaks<br>• $<80\%$ of minutes below 100 CPM<br>• $\geq 3$ consecutive min $\geq 100$ CPM<br>• $\geq 1500$ CPM<br>- PA | 60s              | $\geq 4$                                              | $\geq 600$ min         | $\geq 60$ min |
| Colley et al. [35]    | Volume                            | Actical (unknown)    | SED: 0–99 CPM<br>MVPA: $\geq 1500$ CPM                                                                                                                                                                                                                                                                         | 60s              | $\geq 4$                                              | $\geq 600$ min         | $\geq 60$ min |

|                           |                                         |                         |                                                                                                                           |         |    |                                      |         |
|---------------------------|-----------------------------------------|-------------------------|---------------------------------------------------------------------------------------------------------------------------|---------|----|--------------------------------------|---------|
|                           |                                         |                         |                                                                                                                           |         |    |                                      |         |
| Dalene et al. [36]        | Volume<br>ISM_Bouts                     | ActiGraph<br>(unknown)  | - PA<br>SED: 0–99 CPM/LPA: 100–1999 CPM<br>MPA: 2000–5999 CPM/VPA: ≥6000 CPM                                              | 10s     | ≥2 | ≥600 min                             | ≥20 min |
|                           |                                         |                         | - ISM_Bouts 10 min                                                                                                        |         |    |                                      |         |
| del Pozo-Cruz et al. [37] | Volume<br>ISM_Bouts                     | ActiGraph<br>(unknown)  | - PA<br>SED: <1.5 METs (0–149 CPM)<br>LPA: 1.5≤ METs <3 (150–499 CPM)<br>MPA: 3≤ METs <6 (500–5999 CPM)<br>VPA: ≥6000 CPM | 10s     | ≥3 | ≥600 min                             | ≥20 min |
|                           |                                         |                         | - ISM_Bouts<br>• 5–19 years age group: 60 min<br>• 20–24 years age group: 30 min                                          |         |    |                                      |         |
| Ekelund et al. [38]       | Volume                                  | ActiGraph<br>(uniaxial) | SED: <500 CPM/LPA: 501–2000 CPM<br>MPA: 2001–3999 CPM/VPA: ≥4000 CPM                                                      | 60s     | ≥3 | ≥600 min                             | ≥10 min |
| Hansen et al. [39]        | Volume<br>ISM_Bouts                     | ActiGraph<br>(uniaxial) | - PA<br>SED: 0–25 counts/15s<br>LPA: 26–573 counts/15s<br>MPA: 574–1002 counts/15s<br>VPA: ≥1003 counts/15s               | 60s     | ≥1 | ≥600 min<br><1080 min                | ≥60 min |
|                           |                                         |                         | - ISM_Bouts: 10 min                                                                                                       |         |    |                                      |         |
| Katzmarzyk et al. [40]    | Volume                                  | ActiGraph<br>(unknown)  | SED: <25 counts/15s<br>MVPA: ≥574 counts/15s<br>VPA: ≥1003 counts/15s                                                     | 15s     | ≥4 | ≥600 min<br>(at least 1 weekend day) | ≥20 min |
| Kuzik et al. [41]         | Volume                                  | ActiGraph<br>(unknown)  | SED: 0–99 CPM/MPA: 3–5.9 METs<br>VPA: ≥6 METs/MVPA: ≥3 METs                                                               | 60s     | ≥1 | ≥600 min                             | ≥60 min |
| Loprinzi et al. [42]      | Volume<br>ISM_Bouts                     | ActiGraph               | - PA<br>SED: 0–99 CPM/LIPA: ≥100 CPM<br>MPA: ≥2220 CPM/VPA: ≥4136 CPM                                                     | unknown | ≥4 | ≥600 min                             | ≥60 min |
|                           |                                         |                         | - ISM_Bouts: 60 min                                                                                                       |         |    |                                      |         |
| Mitchell et al. [43]      | Volume                                  | ActiGraph<br>(unknown)  | SED: 0–99 CPM/LPA: 100–2295 CPM<br>MVPA: ≥2296 CPM                                                                        | 60s     | ≥3 | ≥600 min                             | ≥60 min |
| Moore et al. [44]         | Volume<br>ISM_Bouts                     | ActiGraph<br>(unknown)  | - PA<br>• Pate's study: SED: 0–152 CPM<br>MPA: 1677–3364 CPM/VPA: ≥3365 CPM                                               | 60s     | ≥3 | ≥600 min                             | ≥60 min |
|                           |                                         |                         | • Evenson's study: SED: 0–100 CPM<br>MPA: 2296–4011 CPM/VPA: ≥4012 CPM                                                    |         |    |                                      |         |
|                           |                                         |                         | • ICAD's study: SED: 0–100 CPM<br>MPA: 3000–6000 CPM/VPA: ≥6001 CPM                                                       |         |    |                                      |         |
| Moura et al. [45]         | Volume<br>PA/SED_Bouts<br>ISM_Bouts     | ActiGraph<br>(triaxial) | - ISM_Bouts: 5, 10, 20, 50 min                                                                                            | 15s     | ≥3 | ≥480 min                             | ≥60 min |
|                           |                                         |                         | - PA<br>SED: ≤720 CPM/LIPA: 721–3027 CPM<br>MVPA: ≥3028 CPM                                                               |         |    |                                      |         |
| Moura et al. [46]         | Volume<br>(CPM, min/day)<br>Time blocks | ActiGraph<br>(triaxial) | - PA/SED_Bouts<br>≥10 min (drop time of 2 min)                                                                            | 15s     | ≥3 | ≥480 min                             | ≥60 min |
|                           |                                         |                         | - ISM_Bouts: 5, 10, 30, 60 min<br>- PA<br>MVPA: ≥3028 CPM<br>- Sitting time<br>Sitting-High: ≥391.8 min/day               |         |    |                                      |         |

|                           |                                   |                                                                                                             |                                                                                                                                                                                                                                         |         |                                        |                                              |         |
|---------------------------|-----------------------------------|-------------------------------------------------------------------------------------------------------------|-----------------------------------------------------------------------------------------------------------------------------------------------------------------------------------------------------------------------------------------|---------|----------------------------------------|----------------------------------------------|---------|
|                           |                                   |                                                                                                             | Sitting-Low: <391.8 min/day<br>- Standing time<br>Standing-High: ≥409.2 min/day<br>Standing-Low: <409.2 min/day<br>- Bouts: 15, 30, 60, 120 min                                                                                         |         |                                        |                                              |         |
| Nguyen et al. [47]        | Volume                            | ActiGraph (uniaxial)                                                                                        | Lowest activity: <43 min/day<br>MVPA: >103 min/day (≥3.0 MET)                                                                                                                                                                           | 60s     | ≥4                                     | ≥480 min                                     | unknown |
| Rendo-Urteaga et al. [48] | Volume                            | - PA<br>ActiGraph (unknown)<br>+<br>Questionnaire (IPAQ-A)<br>- SED<br>Questionnaire (HELENA questionnaire) | - PA<br>Inactive: 0–99 CPM<br>MPA: 2000–3999 CPM<br>VPA: ≥4000 CPM                                                                                                                                                                      | 15s     | ≥3                                     | ≥480 min                                     | unknown |
| Saunders et al. [5]       | Volume<br>SED_Bouts<br>SED_Breaks | ActiGraph (unknown)                                                                                         | - PA<br>SED: <100 CPM/LPA: 100–2296 CPM<br>MVPA: ≥2296 CPM<br>- SED_Bouts<br>• ≥1 min with 0–99 CPM<br>• Daily bouts of SED<br>: 1–4, 5–9, 10–14, 15–29, ≥30 min<br>- SED_Breaks<br>• Time lasting ≥1 min<br>• CPM rose to 100 or above | 60s     | ≥4                                     | ≥600 min                                     | ≥60 min |
| Stockwell et al. [49]     | Volume                            | activPAL                                                                                                    | - Sitting_Bouts<br>≥30 min<br>- Sitting_Breaks<br>a non-sitting period in between two sitting bouts                                                                                                                                     | 15s     | ≥4<br>(include at least 1 weekend day) | ≥600 min                                     | unknown |
| Strizich et al. [50]      | Volume                            | Actical                                                                                                     | SED: <18 counts/15s<br>MVP: ≥441 counts/15s                                                                                                                                                                                             | unknown | ≥3                                     | ≥480 min<br><1140 min                        | ≥90 min |
| Treuth et al. [51]        | Volume                            | Actiwatch (omnidirectional)                                                                                 | SED: <100 CPM/LPA: 100 to <900 CPM<br>MPA: 900 to <2200 CPM/VPA: ≥2200 CPM                                                                                                                                                              | 60s     | ≥4<br>(with 2 weekend days)            | ≥1000 min                                    | unknown |
| Verswijveren et al. [52]  | Volume<br>ISM_Bouts               | ActiGraph (uniaxial)                                                                                        | - PA<br>SED: ≤100 CPM<br>LPA: 1.5–3.99 METs<br>MPA: 4–5.99 METs<br>VPA: ≥6 METs<br>- ISM_Bouts<br>LPA, MPA, VPA bouts ≥1 min                                                                                                            | 15s     | ≥4                                     | ≥480 min<br>(≥420 on weekday + weekend days) | ≥20 min |
| White et al. [53]         | Volume<br>PA_Bouts                | ActiGraph (unknown)                                                                                         | - PA<br>1) Triano: SED: 0–99 CPM, LPA: 101–2019 CPM, MPA: 2020–5998 CPM, VPA: ≥5999 CPM<br>2) Freedson: SED: ≤149 CPM, LPA: 150–499 CPM, MPA: 500–3999 CPM, VPA: 4000–7599 CPM, VVPA: ≥7600 CPM                                         | 60s     | ≥1                                     | ≥600 min                                     | ≥60 min |

---

3) Evenson: SED:  $\leq 25$  counts/15s,  
LPA: 26–573 counts/15s, MPA: 574–  
1002 counts/15s, VPA:  $\geq 1003$   
counts/15s  
- PA\_Bout  
Sporadic: 1–4.9 min of continuous  
MVPA  
Short: 5–9.9 min of continuous MVPA  
Medium-long:  $\geq 10$  min of continuous  
MVPA

---

Abbreviations: CPM, counts per minute—an indicator of the total volume of physical activity (e.g., average intensity of PA); HEL-ENA, healthy lifestyle in Europe by nutrition in adolescents; IPAQ-A, international physical activity questionnaire for adolescents; ISM, isotemporal substitution model; LPA, light-intensity physical activity; METs, metabolic equivalents; MPA, moderate-intensity physical activity; MVPA, moderate-to-vigorous physical activity; PA, physical activity; SED, sedentary time; SVMgs, signal magnitude vector (gravity-subtracted) expressed in 1s epochs; VPA, vigorous physical activity; VVPA, very vigorous physical activity

---
